# Supplementary material for: RHYTHM: An Open Source Imaging Toolkit for Cardiac Panoramic Optical Mapping
Source: PubMed Central journal article supplement (PMC5811559; doi:10.1038/s41598-018-21333-w), 2018-02-13
Supplement: 41598_2018_21333_MOESM1_ESM.pdf [file 41598_2018_21333_MOESM1_ESM.pdf]

# RHYTHM: An Open Source Imaging Toolkit for Cardiac Panoramic Optical Mapping

Christopher Gloschat<sup>1</sup>, Kedar Aras<sup>1</sup>, Shubham Gupta<sup>1</sup>, N. Rokhaya Faye<sup>1</sup>, Hanyu Zhang<sup>2</sup>, Roman A. Syunyaev<sup>3</sup>, Roman A. Pryamonosov<sup>3,4</sup>, Jack Rogers<sup>2</sup>, Matthew W. Kay<sup>1</sup>, and Igor R. Efimov<sup>1,3\*</sup>

<sup>1</sup>The George Washington University, Department of Biomedical Engineering, Washington, 20052, USA

<sup>2</sup>The University of Alabama at Birmingham, Department of Biomedical Engineering Birmingham, 35294, USA

<sup>3</sup>Moscow Institute of Physics and Technology, Dolgoprudny, 141701, Russia

<sup>4</sup>Institute of Numerical Mathematics of the Russian Academy of Sciences, Moscow, 119991, Russia

\*efimov@gwu.edu

## Supplementary Figures

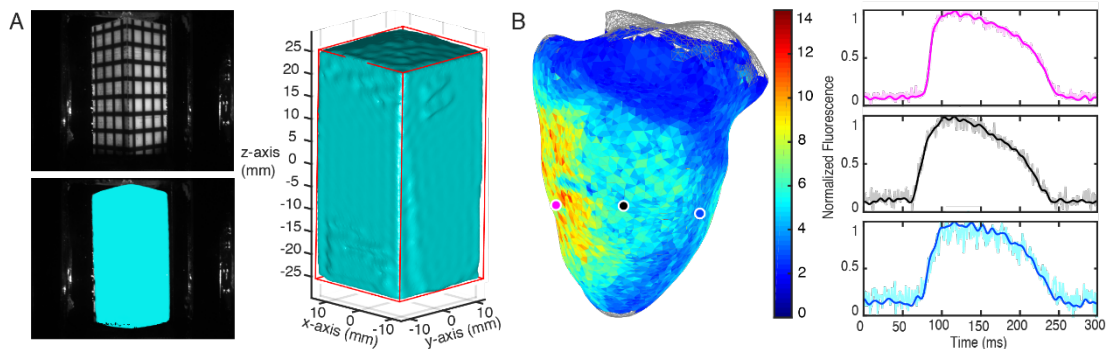

**Supplementary Figure 1. Geometric accuracy and signal-to-noise ratio (SNR).** (A) To validate the geometric accuracy, an object of known volume and geometry (i.e. the calibration cuboid) was reconstructed. The reconstructed volume was within 3% of the measured volume of the cuboid. (B) Subtle inhomogeneities in lighting result in measurable differences in signal quality. Uniform lighting, not only benefits SNR, but can improve camera calibration.

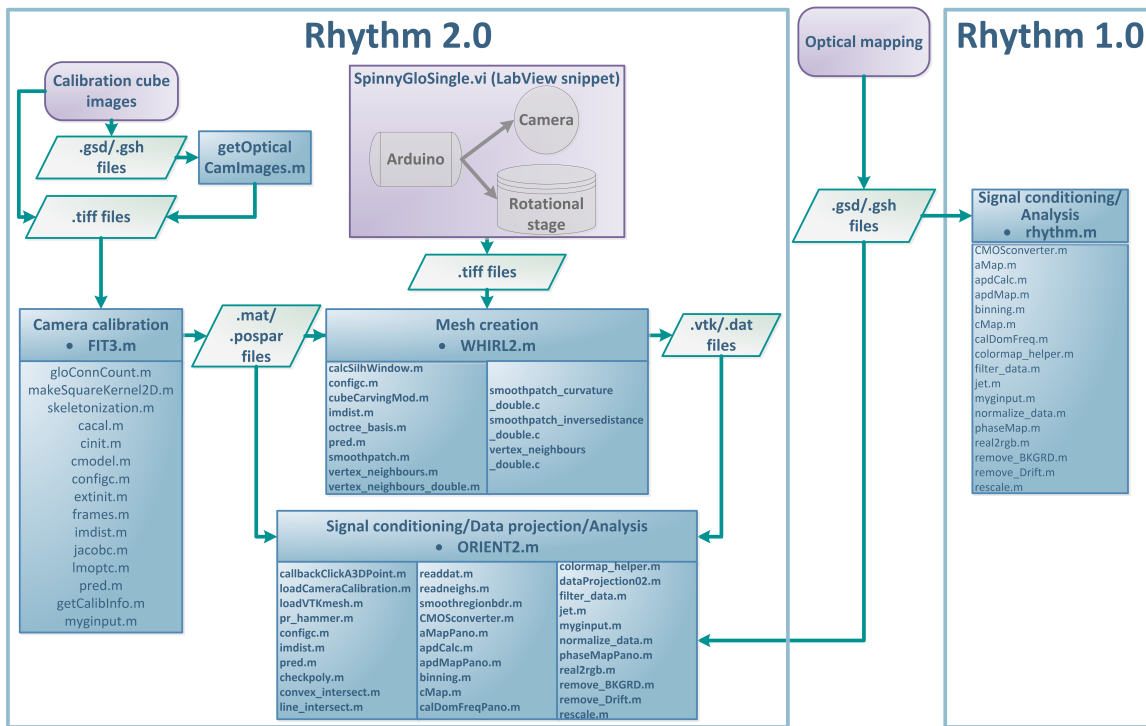

**Supplementary Figure 2. Software Architecture.** General scheme of software structure and data file format. Rhythm 1.0 (right-hand side) is intended for single camera users. Rhythm 2.0 (left-hand side) is intended for panoramic mapping.

## Supplementary Files

The software for acquiring, processing, and analyzing the resultant panoramic has been uploaded to GitHub at <https://github.com/optocardiography>. Among the files is a README.txt file which provides instructions for installation and documentation which provides an explanation of use. At the same URL are located a document outlining the 3D printed components and the files required to print them.
